# Supplementary material for: An Ultradian Feeding Schedule in Rats Affects Metabolic Gene Expression in Liver, Brown Adipose Tissue and Skeletal Muscle with Only Mild Effects on Circadian Clocks
Source: MDPI journal article supplement (doi:10.3390/ijms19103171), 2018-10-15
Supplement: s1 [file s1]

# BAT

| ad lib   | Bmal1 | Cry1  | Cry 2 | Per1  | Per2 | Dbp   | Rev-erba | Ucp1  | Ucp3 | Ppara | Pgc-1α | Glut2 | Glut4 | Pdk4 | Hsl   | Lpl  | Srebp1c | Sirt1 | Sirt3 | Fas   | Fgf21 |
|----------|-------|-------|-------|-------|------|-------|----------|-------|------|-------|--------|-------|-------|------|-------|------|---------|-------|-------|-------|-------|
| Bmal1    |       |       |       |       |      |       |          |       |      |       |        |       |       |      |       |      |         |       |       |       |       |
| Cry1     | 0.75  |       |       |       |      |       |          |       |      |       |        |       |       |      |       |      |         |       |       |       |       |
| Cry 2    | 0.09  | 0.65  |       |       |      |       |          |       |      |       |        |       |       |      |       |      |         |       |       |       |       |
| Per1     | -0.28 | 0.37  | 0.58  |       |      |       |          |       |      |       |        |       |       |      |       |      |         |       |       |       |       |
| Per2     | -0.41 | 0.26  | 0.58  | 0.99  |      |       |          |       |      |       |        |       |       |      |       |      |         |       |       |       |       |
| Dbp      | -0.93 | -0.93 | -0.44 | -0.02 | 0.11 |       |          |       |      |       |        |       |       |      |       |      |         |       |       |       |       |
| Rev-erba | -1.00 | -0.77 | -0.17 | 0.28  | 0.41 | 0.95  |          |       |      |       |        |       |       |      |       |      |         |       |       |       |       |
| Ucp1     | -0.05 | 0.47  | 0.37  | 0.93  | 0.87 | -0.17 | 0.08     |       |      |       |        |       |       |      |       |      |         |       |       |       |       |
| Ucp3     |       |       |       |       |      |       |          |       |      |       |        |       |       |      |       |      |         |       |       |       |       |
| Ppara    | -0.58 | 0.07  | 0.47  | 0.95  | 0.98 | 0.30  | 0.58     | 0.80  |      |       |        |       |       |      |       |      |         |       |       |       |       |
| Pgc-1α   | -0.71 | -0.08 | 0.46  | 0.86  | 0.93 | 0.43  | 0.70     | 0.66  |      | 0.98  |        |       |       |      |       |      |         |       |       |       |       |
| Glut2    |       |       |       |       |      |       |          |       |      |       |        |       |       |      |       |      |         |       |       |       |       |
| Glut4    | 0.12  | 0.71  | 0.69  | 0.92  | 0.86 | -0.41 | -0.12    |       |      | 0.74  | 0.61   |       |       |      |       |      |         |       |       |       |       |
| Pdk4     | -0.41 | 0.23  | 0.49  | 0.99  | 0.99 | 0.13  | 0.42     | 0.91  |      | 0.98  | 0.91   |       |       |      |       |      |         |       |       |       |       |
| Hsl      | -0.02 | 0.64  | 0.79  | 0.94  | 0.90 | -0.32 | 0.00     | 0.86  |      | 0.81  | 0.72   |       | 0.85  | 0.98 | 0.88  |      |         |       |       |       |       |
| Lpl      | -0.41 | 0.24  | 0.51  | 0.99  | 1.00 | 0.12  | 0.42     | 0.90  |      | 0.98  | 0.92   |       | 0.85  | 1.00 | 0.89  |      |         |       |       |       |       |
| Srebp1c  | 0.25  | 0.61  | 0.25  | 0.77  | 0.67 | -0.39 | -0.20    | 0.95  |      | 0.56  | 0.38   |       | 0.86  | 0.72 | 0.75  | 0.71 |         |       |       |       |       |
| Sirt1    |       |       |       |       |      |       |          |       |      |       |        |       |       |      |       |      |         |       |       |       |       |
| Sirt3    | -0.37 | -0.39 | -0.60 | 0.30  | 0.29 | 0.49  | 0.46     | 0.48  |      | 0.37  | 0.30   |       | 0.09  | 0.39 | -0.01 | 0.37 | 0.47    |       |       |       |       |
| Fas      | 0.37  | 0.72  | 0.33  | 0.73  | 0.62 | -0.52 | -0.33    | 0.91  |      | 0.49  | 0.30   |       | 0.88  | 0.66 | 0.76  | 0.65 | 0.99    |       | 0.34  |       |       |
| Fgf21    | -0.96 | -0.73 | 0.02  | 0.16  | 0.30 | 0.88  | 0.94     | -0.14 |      | 0.46  | 0.63   |       | -0.21 | 0.27 | -0.04 | 0.28 | -0.44   |       | 0.12  | -0.54 |       |

| 6M       | Bmal1 | Cry1  | Cry 2 | Per1  | Per2  | Dbp   | Rev-erba | Ucp1  | Ucp3 | Ppara | Pgc-1α | Glut2 | Glut4 | Pdk4  | Hsl  | Lpl   | Srebp1c | Sirt1 | Sirt3 | Fas  | Fgf21 |
|----------|-------|-------|-------|-------|-------|-------|----------|-------|------|-------|--------|-------|-------|-------|------|-------|---------|-------|-------|------|-------|
| Bmal1    |       |       |       |       |       |       |          |       |      |       |        |       |       |       |      |       |         |       |       |      |       |
| Cry1     | 0.44  |       |       |       |       |       |          |       |      |       |        |       |       |       |      |       |         |       |       |      |       |
| Cry 2    | 0.04  | 0.73  |       |       |       |       |          |       |      |       |        |       |       |       |      |       |         |       |       |      |       |
| Per1     | -0.40 | 0.10  | 0.75  |       |       |       |          |       |      |       |        |       |       |       |      |       |         |       |       |      |       |
| Per2     | -0.61 | 0.17  | 0.74  | 0.93  |       |       |          |       |      |       |        |       |       |       |      |       |         |       |       |      |       |
| Dbp      | -0.93 | -0.25 | 0.30  | 0.71  | 0.86  |       |          |       |      |       |        |       |       |       |      |       |         |       |       |      |       |
| Rev-erba | -0.80 | -0.69 | -0.05 | 0.60  | 0.59  | 0.83  |          |       |      |       |        |       |       |       |      |       |         |       |       |      |       |
| Ucp1     | -0.61 | -0.05 | 0.63  | 0.97  | 0.96  | 0.86  | 0.74     |       |      |       |        |       |       |       |      |       |         |       |       |      |       |
| Ucp3     |       |       |       |       |       |       |          |       |      |       |        |       |       |       |      |       |         |       |       |      |       |
| Ppara    | 0.70  | -0.03 | -0.64 | -0.92 | -0.99 | -0.92 | -0.70    | -0.98 |      |       |        |       |       |       |      |       |         |       |       |      |       |
| Pgc-1α   | -0.31 | -0.98 | -0.83 | -0.26 | -0.35 | 0.09  | 0.55     | -0.13 |      | 0.21  |        |       |       |       |      |       |         |       |       |      |       |
| Glut2    |       |       |       |       |       |       |          |       |      |       |        |       |       |       |      |       |         |       |       |      |       |
| Glut4    | -0.82 | -0.36 | 0.32  | 0.82  | 0.86  | 0.95  | 0.92     | 0.93  |      | -0.92 | 0.19   |       |       |       |      |       |         |       |       |      |       |
| Pdk4     | -0.09 | 0.50  | 0.96  | 0.90  | 0.84  | 0.45  | 0.21     | 0.80  |      | -0.77 | -0.64  |       | 0.53  |       |      |       |         |       |       |      |       |
| Hsl      | -0.68 | -0.40 | 0.33  | 0.87  | 0.81  | 0.85  | 0.92     | 0.93  |      | -0.87 | 0.23   |       | 0.97  | 0.57  |      |       |         |       |       |      |       |
| Lpl      | -0.20 | 0.69  | 0.96  | 0.74  | 0.84  | 0.49  | 0.05     | 0.68  |      | -0.75 | -0.81  |       | 0.43  | 0.90  | 0.38 |       |         |       |       |      |       |
| Srebp1c  | -0.99 | -0.29 | 0.11  | 0.47  | 0.70  | 0.95  | 0.74     | 0.67  |      | -0.77 | 0.15   |       | 0.82  | 0.21  | 0.67 | 0.36  |         |       |       |      |       |
| Sirt1    |       |       |       |       |       |       |          |       |      |       |        |       |       |       |      |       |         |       |       |      |       |
| Sirt3    | -0.18 | 0.79  | 0.86  | 0.51  | 0.69  | 0.39  | -0.15    | 0.48  |      | -0.60 | -0.88  |       | 0.24  | 0.73  | 0.14 | 0.95  | 0.34    |       |       |      |       |
| Fas      | -0.77 | 0.12  | 0.61  | 0.80  | 0.96  | 0.93  | 0.60     | 0.89  |      | -0.97 | -0.29  |       | 0.85  | 0.68  | 0.75 | 0.77  | 0.85    |       | 0.69  |      |       |
| Fgf21    | -0.66 | -0.72 | -0.76 | -0.39 | -0.20 | 0.34  | 0.44     | -0.15 |      | 0.07  | 0.72   |       | 0.20  | -0.69 | 0.08 | -0.55 | 0.55    |       | -0.44 | 0.03 |       |

- significant correlation
- significant correlation lost for 6M feeding
- significant correlation for 6M & ad lib in SAME direction
- significant correlation for 6M & ad lib in OPPOSITE direction
