# Supplementary material for: An Ultradian Feeding Schedule in Rats Affects Metabolic Gene Expression in Liver, Brown Adipose Tissue and Skeletal Muscle with Only Mild Effects on Circadian Clocks
Source: MDPI journal article supplement (doi:10.3390/ijms19103171), 2018-10-15
Supplement: s1 [file s1]

## Liver

| ad lib   | Bmal1 | Cry1  | Cry 2 | Per1  | Per2  | Dbp   | Rev-erba | Ucp1 | Ucp3 | Ppara | Pgc-1α | Glut2 | Glut4 | Pdk4  | Hsl   | Lpl   | Srebp1c | Sirt1 | Sirt3 | Fas | Fgf21 |
|----------|-------|-------|-------|-------|-------|-------|----------|------|------|-------|--------|-------|-------|-------|-------|-------|---------|-------|-------|-----|-------|
| Bmal1    |       |       |       |       |       |       |          |      |      |       |        |       |       |       |       |       |         |       |       |     |       |
| Cry1     | 0.59  |       |       |       |       |       |          |      |      |       |        |       |       |       |       |       |         |       |       |     |       |
| Cry 2    | 0.33  | 0.88  |       |       |       |       |          |      |      |       |        |       |       |       |       |       |         |       |       |     |       |
| Per1     | -0.76 | -0.03 | 0.02  |       |       |       |          |      |      |       |        |       |       |       |       |       |         |       |       |     |       |
| Per2     | -0.35 | 0.55  | 0.69  | 0.74  |       |       |          |      |      |       |        |       |       |       |       |       |         |       |       |     |       |
| Dbp      | -0.95 | -0.75 | -0.59 | 0.68  | 0.11  |       |          |      |      |       |        |       |       |       |       |       |         |       |       |     |       |
| Rev-erba | -0.58 | -0.97 | -0.76 | -0.06 | -0.53 | 0.69  |          |      |      |       |        |       |       |       |       |       |         |       |       |     |       |
| Ucp1     |       |       |       |       |       |       |          |      |      |       |        |       |       |       |       |       |         |       |       |     |       |
| Ucp3     |       |       |       |       |       |       |          |      |      |       |        |       |       |       |       |       |         |       |       |     |       |
| Ppara    | -0.60 | -0.99 | -0.93 | 0.12  | -0.53 | 0.79  | 0.92     |      |      |       |        |       |       |       |       |       |         |       |       |     |       |
| Pgc-1α   | 0.52  | 0.97  | 0.76  | 0.12  | 0.58  | -0.64 | -1.00    |      |      | -0.92 |        |       |       |       |       |       |         |       |       |     |       |
| Glut2    | -0.90 | -0.27 | -0.13 | 0.96  | 0.61  | 0.84  | 0.21     |      |      | 0.34  | -0.14  |       |       |       |       |       |         |       |       |     |       |
| Glut4    |       |       |       |       |       |       |          |      |      |       |        |       |       |       |       |       |         |       |       |     |       |
| Pdk4     | 0.70  | -0.16 | -0.35 | -0.92 | -0.91 | -0.51 | 0.16     |      |      | 0.12  | -0.22  | -0.88 |       |       |       |       |         |       |       |     |       |
| Hsl      | 0.49  | -0.34 | -0.34 | -0.93 | -0.89 | -0.36 | 0.41     |      |      | 0.25  | -0.47  | -0.80 |       | 0.92  |       |       |         |       |       |     |       |
| Lpl      | 0.54  | -0.34 | -0.60 | -0.75 | -0.96 | -0.29 | 0.28     |      |      | 0.34  | -0.33  | -0.70 |       | 0.95  | 0.82  |       |         |       |       |     |       |
| Srebp1c  | 0.53  | 0.98  | 0.81  | 0.10  | 0.60  | -0.66 | -1.00    |      |      | -0.94 | 1.00   | -0.16 |       | -0.23 | -0.46 | -0.36 |         |       |       |     |       |
| Sirt1    | 0.00  | -0.80 | -0.88 | -0.48 | -0.94 | 0.25  | 0.76     |      |      | 0.79  | -0.80  | -0.30 |       | 0.71  | 0.75  | 0.83  | -0.82   |       |       |     |       |
| Sirt3    |       |       |       |       |       |       |          |      |      |       |        |       |       |       |       |       |         |       |       |     |       |
| Fas      | -0.31 | 0.55  | 0.78  | 0.59  | 0.97  | 0.03  | -0.46    |      |      | -0.56 | 0.51   | 0.50  |       | -0.85 | -0.76 | -0.97 | 0.54    | -0.93 |       |     |       |
| Fgf21    | 0.11  | -0.67 | -0.56 | -0.72 | -0.88 | 0.02  | 0.74     |      |      | 0.57  | -0.78  | -0.51 |       | 0.74  | 0.92  | 0.72  | -0.76   | 0.87  |       |     | -0.75 |

| 6M       | Bmal1 | Cry1  | Cry 2 | Per1  | Per2  | Dbp   | Rev-erba | Ucp1 | Ucp3 | Ppara | Pgc-1α | Glut2 | Glut4 | Pdk4  | Hsl   | Lpl   | Srebp1c | Sirt1 | Sirt3 | Fas | Fgf21 |
|----------|-------|-------|-------|-------|-------|-------|----------|------|------|-------|--------|-------|-------|-------|-------|-------|---------|-------|-------|-----|-------|
| Bmal1    |       |       |       |       |       |       |          |      |      |       |        |       |       |       |       |       |         |       |       |     |       |
| Cry1     | 0.48  |       |       |       |       |       |          |      |      |       |        |       |       |       |       |       |         |       |       |     |       |
| Cry 2    | -0.16 | 0.55  |       |       |       |       |          |      |      |       |        |       |       |       |       |       |         |       |       |     |       |
| Per1     | -0.65 | -0.49 | 0.46  |       |       |       |          |      |      |       |        |       |       |       |       |       |         |       |       |     |       |
| Per2     | -0.66 | 0.34  | 0.65  | 0.29  |       |       |          |      |      |       |        |       |       |       |       |       |         |       |       |     |       |
| Dbp      | -0.88 | -0.67 | 0.20  | 0.91  | 0.37  |       |          |      |      |       |        |       |       |       |       |       |         |       |       |     |       |
| Rev-erba | -0.76 | -0.93 | -0.26 | 0.70  | 0.02  | 0.89  |          |      |      |       |        |       |       |       |       |       |         |       |       |     |       |
| Ucp1     |       |       |       |       |       |       |          |      |      |       |        |       |       |       |       |       |         |       |       |     |       |
| Ucp3     |       |       |       |       |       |       |          |      |      |       |        |       |       |       |       |       |         |       |       |     |       |
| Ppara    | -0.97 | -0.48 | 0.30  | 0.80  | 0.64  | 0.94  | 0.77     |      |      |       |        |       |       |       |       |       |         |       |       |     |       |
| Pgc-1α   | 0.75  | -0.12 | -0.77 | -0.65 | -0.91 | -0.65 | -0.26    |      |      | -0.81 |        |       |       |       |       |       |         |       |       |     |       |
| Glut2    | -0.97 | -0.46 | -0.02 | 0.43  | 0.63  | 0.75  | 0.70     |      |      | 0.88  | -0.62  |       |       |       |       |       |         |       |       |     |       |
| Glut4    |       |       |       |       |       |       |          |      |      |       |        |       |       |       |       |       |         |       |       |     |       |
| Pdk4     | 0.78  | -0.06 | -0.22 | -0.11 | -0.88 | -0.39 | -0.22    |      |      | -0.66 | 0.71   | -0.85 |       |       |       |       |         |       |       |     |       |
| Hsl      | -0.21 | 0.63  | 0.97  | 0.34  | 0.78  | 0.14  | -0.32    |      |      | 0.31  | -0.80  | 0.07  |       | -0.39 |       |       |         |       |       |     |       |
| Lpl      | 0.07  | -0.74 | -0.95 | -0.20 | -0.73 | 0.01  | 0.47     |      |      | -0.17 | 0.71   | 0.04  |       | 0.33  | -0.99 |       |         |       |       |     |       |
| Srebp1c  | -0.20 | -0.66 | -0.93 | -0.29 | -0.36 | 0.07  | 0.48     |      |      | 0.04  | 0.48   | 0.39  |       | -0.13 | -0.87 | 0.89  |         |       |       |     |       |
| Sirt1    | -0.76 | -0.25 | 0.65  | 0.93  | 0.61  | 0.88  | 0.56     |      |      | 0.88  | -0.88  | 0.57  |       | -0.41 | 0.59  | -0.46 | -0.40   |       |       |     |       |
| Sirt3    |       |       |       |       |       |       |          |      |      |       |        |       |       |       |       |       |         |       |       |     |       |
| Fas      | -0.50 | -0.69 | -0.76 | -0.09 | -0.07 | 0.31  | 0.63     |      |      | 0.33  | 0.17   | 0.66  |       | -0.40 | -0.68 | 0.74  | 0.95    | -0.14 |       |     |       |
| Fgf      | 0.78  | 0.08  | -0.72 | -0.82 | -0.78 | -0.79 | -0.43    |      |      | -0.88 | 0.97   | -0.62 |       | 0.58  | -0.71 | 0.60  | 0.44    | -0.97 |       |     | 0.15  |

|  |                                                               |
|--|---------------------------------------------------------------|
|  | significant correlation                                       |
|  | significant correlation lost for 6M feeding                   |
|  | significant correlation for 6M & ad lib in SAME direction     |
|  | significant correlation for 6M & ad lib in OPPOSITE direction |
