# Supplementary material for: An Ultradian Feeding Schedule in Rats Affects Metabolic Gene Expression in Liver, Brown Adipose Tissue and Skeletal Muscle with Only Mild Effects on Circadian Clocks
Source: MDPI journal article supplement (doi:10.3390/ijms19103171), 2018-10-15
Supplement: s1 [file s1]

Table S1: Primer list

| Genes               | Forward primer          | Reverse primer          |
|---------------------|-------------------------|-------------------------|
| <b>Housekeeping</b> |                         |                         |
| Cyclophilin         | ATGTGGTCTTTGGGAAGGTG    | GAAGGAATGGTTTGATGGGT    |
| GAPDH               | TGAACGGGAAGCTCACTGG     | TCCACCACCCTGTTG CTGTA   |
| HPRT1               | GCAGTACAGCCCCAAAATGG    | AACAAAGTCTGGCCTGTATCCAA |
| TBP                 | TTCGTGCCAGAAATGCTGAA    | TGCACACCATTTTCCCAGAAC   |
| <b>Clock</b>        |                         |                         |
| Bmal1               | CCGATGACGAACTGAAACACCT  | TGCAGTGTCCGAGGAAGATAGC  |
| Cry1                | AAGTCATCGTGCGCATTTCA    | TCATCATGGTCGTCGGACAGA   |
| Cry2                | TGGATAAGCACTTGGAACGGAA  | TGTACAAGTCCCACAGGCGGTA  |
| DBP                 | CCTTTGAACCTGATCCGGCT    | TGCCTTCTTCATGATTGGCTG   |
| Per1                | CGCACTTCGGGAGCTCAAACCTC | GTCCATGGCACAGGGCTCACC   |
| Per2                | CACCCTGAAAAGAAAGTGCGA   | CAACGCCAAGGAGCTCAAGT    |
| Rev-erb $\alpha$    | ACAGCTGACACCACCCAGATC   | CATGGGCATAGGTGAAGATTCT  |
| <b>Metabolic</b>    |                         |                         |
| Fas                 | CTTGGGTGCCGATTACAACC    | GCCCTCCCGTACACTCACTC    |
| Glut2               | GTCCAGAAAGCCCCAGATACC   | TGCCCCTTAGTCTTTCAAGCT   |
| Glut4               | GGGCTGTGAGTGAGTGCTTTC   | CAGCGAGGCAAGGCTAGA      |
| HSL                 | CACACAGCATGGATTTACGCA   | ACCTGCAAAGACGTTGGACAG   |
| LPL                 | CAAAACAACCAGGCCTTCGA    | AGCAATTCCCCGATGTCCA     |
| Pdk4                | TGGTTTTGGTTACGGCTTGC    | TGCCAGTTTCTCCTTCGACA    |
| Pgc1 $\alpha$       | TGCCATTGTTAAGACCGAG     | GGTCATTTGGTGACTCTGG     |
| Ppara $\alpha$      | TCACACAATGCAATCCGTTT    | GGCCTTGACCTTGTTTATGT    |
| Srebp1c             | ACAAGATTGTGGAGCTCAAGG   | TGCGCAAGACAGCAGATTTA    |
| Ucp1                | AATCAGCTTTGCTTCCCTCA    | GCTTTGTGCTTGCACTTCTGA   |
| Ucp3                | GCACTGCAGCCTGTTTTGCTGA  | ATAGTCAGGATGGTACCGAGCA  |
| Sirt1               | TGTTTCCTGTGGGATACCTGA   | TGAAGAATGGTCTTGGGTCTTT  |
| Sirt3               | GACATACGGGCTGACGTGAT    | AGTCGGGGCACTGATTCTG     |
| Fgf21               | ACCGCAGTCCAGAAAGTCTC    | GGCCTCAGACTGGTACACAT    |

Table S2: t-test analysis for behavioral and physiological parameters.

|                            |          | <i>Ad libitum</i> | SEM   | 6-meal    | SEM   | <i>P</i> value | Shift |
|----------------------------|----------|-------------------|-------|-----------|-------|----------------|-------|
| Locomotor Activity         | <b>a</b> | 379.7             | 37.9  | 358.6     | 8.9   | =0.60          | ~ 2h  |
|                            | <b>b</b> | 221.5             | 7.1   | 193.4     | 9.7   | = <b>0.02</b>  |       |
|                            | <b>c</b> | 19.3 (ZT)         | 0.2   | 17.3 (ZT) | 0.4   | < <b>0.001</b> |       |
| Respiratory exchange ratio | <b>a</b> | 0.95              | 0.003 | 0.93      | 0.01  | =0.054         | ~ 10h |
|                            | <b>b</b> | 0.0214            | 0.001 | 0.0206    | 0.001 | =0.73          |       |
|                            | <b>c</b> | 19.9 (ZT)         | 0.1   | 10.1 (ZT) | 0.8   | < <b>0.001</b> |       |
| Temperature                | <b>a</b> | 36.8              | 0.1   | 36.25     | 0.07  | = <b>0.02</b>  |       |
|                            | <b>b</b> | 0.48              | 0.1   | 0.34      | 0.02  | =0.46          |       |
|                            | <b>c</b> | 17.8 (ZT)         | 0.3   | 17.4 (ZT) | 0.5   | =0.56          |       |
| Heat production            | <b>a</b> | 5.3               | 0.04  | 5.1       | 0.14  | =0.16          | ~2h   |
|                            | <b>b</b> | 1.1               | 0.05  | 0.6       | 0.01  | < <b>0.001</b> |       |
|                            | <b>c</b> | 19.1 (ZT)         | 0.1   | 16.8 (ZT) | 0.4   | < <b>0.001</b> |       |

Table S3: t-test analysis on significant cosinor parameters for the clock and clock-controlled genes and protein in SCN.

| Genes SCN          |          | <i>Ad libitum</i> |      | 6-meal |      | <i>P</i> value |
|--------------------|----------|-------------------|------|--------|------|----------------|
|                    |          | Mean              | SEM  | Mean   | SEM  |                |
| <i>Avp</i>         | <b>a</b> | 42.03             | 3.85 | 42.79  | 2.94 | =0.879         |
|                    | <b>b</b> | --                | --   | 11.31  | 4.15 |                |
|                    | <b>c</b> | --                | --   | 12.6   | 1.40 |                |
| <i>Per1</i>        | <b>a</b> | 7.70              | 0.70 | 8.94   | 0.45 | =0.15          |
|                    | <b>b</b> | 4.12              | 0.99 | 4.74   | 0.70 | =0.61          |
|                    | <b>c</b> | 6.6               | 0.9  | 5.6    | 0.56 | =0.35          |
| <i>Per2</i>        | <b>a</b> | 7.82              | 0.72 | 7.94   | 0.65 | =0.90          |
|                    | <b>b</b> | 3.24              | 1.02 | 3.75   | 0.92 | =0.70          |
|                    | <b>c</b> | 10.4              | 1.2  | 10.7   | 0.93 | =0.80          |
| <b>Protein SCN</b> |          |                   |      |        |      |                |
| <b>AVP</b>         | <b>a</b> | 65.25             | 4.45 | 64.54  | 5.65 | =0.92          |
|                    | <b>b</b> | --                | --   | --     | --   |                |
|                    | <b>c</b> | --                | --   | --     | --   |                |

Table S4: Two-way ANOVA analysis for gene expression in SCN.

| Genes SCN          | 2 Way ANOVA Table ( <i>P</i> value) |                  |             |
|--------------------|-------------------------------------|------------------|-------------|
|                    | Feeding                             | Time             | Interaction |
| <b><i>Avp</i></b>  | =0.880                              | =0.069           | =0.587      |
| <b><i>Per1</i></b> | =0.164                              | <b>&lt;0.001</b> | =0.767      |
| <b><i>Per2</i></b> | =0.909                              | <b>&lt;0.001</b> | =0.878      |
| <b>Protein SCN</b> |                                     |                  |             |
| <b>AVP</b>         | =0.791                              | <b>&lt;0.001</b> | =0.876      |
