# Supplementary material for: An Ultradian Feeding Schedule in Rats Affects Metabolic Gene Expression in Liver, Brown Adipose Tissue and Skeletal Muscle with Only Mild Effects on Circadian Clocks
Source: MDPI journal article supplement (doi:10.3390/ijms19103171), 2018-10-15
Supplement: s1 [file s1]

## Muscle

| ad lib   | Bmal1 | Cry1  | Cry 2 | Per1  | Per2  | Dbp   | Rev-erba | Ucp1 | Ucp3  | Ppara | Pgc-1α | Glut2 | Glut4 | Pdk4  | Hsl   | Lpl   | Srebp1c | Sirt1 | Sirt3 | Fas | Fgf21 |
|----------|-------|-------|-------|-------|-------|-------|----------|------|-------|-------|--------|-------|-------|-------|-------|-------|---------|-------|-------|-----|-------|
| Bmal1    |       |       |       |       |       |       |          |      |       |       |        |       |       |       |       |       |         |       |       |     |       |
| Cry1     | 0.61  |       |       |       |       |       |          |      |       |       |        |       |       |       |       |       |         |       |       |     |       |
| Cry 2    | 0.04  | 0.81  |       |       |       |       |          |      |       |       |        |       |       |       |       |       |         |       |       |     |       |
| Per1     | -0.87 | -0.16 | 0.43  |       |       |       |          |      |       |       |        |       |       |       |       |       |         |       |       |     |       |
| Per2     | -0.67 | 0.12  | 0.65  | 0.95  |       |       |          |      |       |       |        |       |       |       |       |       |         |       |       |     |       |
| Dbp      | -0.93 | -0.56 | -0.03 | 0.88  | 0.74  |       |          |      |       |       |        |       |       |       |       |       |         |       |       |     |       |
| Rev-erba | -0.49 | -0.99 | -0.88 | 0.04  | -0.23 | 0.48  |          |      |       |       |        |       |       |       |       |       |         |       |       |     |       |
| Ucp1     |       |       |       |       |       |       |          |      |       |       |        |       |       |       |       |       |         |       |       |     |       |
| Ucp3     | 0.74  | -0.08 | -0.64 | -0.94 | -0.94 | -0.68 | 0.23     |      |       |       |        |       |       |       |       |       |         |       |       |     |       |
| Ppara    |       |       |       |       |       |       |          |      |       |       |        |       |       |       |       |       |         |       |       |     |       |
| Pgc-1α   | -0.14 | 0.52  | 0.77  | 0.60  | 0.81  | 0.36  | -0.54    |      | -0.60 |       |        |       |       |       |       |       |         |       |       |     |       |
| Glut2    |       |       |       |       |       |       |          |      |       |       |        |       |       |       |       |       |         |       |       |     |       |
| Glut4    | 0.72  | 0.93  | 0.65  | -0.28 | 0.03  | -0.56 | -0.87    |      | 0.12  |       | 0.56   |       |       |       |       |       |         |       |       |     |       |
| Pdk4     | 0.61  | -0.25 | -0.77 | -0.89 | -0.94 | -0.57 | 0.39     |      | 0.99  |       | -0.69  |       | -0.05 |       |       |       |         |       |       |     |       |
| Hsl      | -0.09 | 0.74  | 0.99  | 0.53  | 0.72  | 0.07  | -0.83    |      | -0.73 |       | 0.76   |       | 0.55  | -0.84 |       |       |         |       |       |     |       |
| Lpl      | 0.35  | 0.92  | 0.90  | 0.05  | 0.27  | -0.43 | -0.97    |      | -0.35 |       | 0.45   |       | 0.72  | -0.49 | 0.87  |       |         |       |       |     |       |
| Srebp1c  | 0.92  | 0.81  | 0.35  | -0.70 | -0.48 | -0.94 | -0.74    |      | 0.46  |       | -0.03  |       | 0.80  | 0.32  | 0.24  | 0.67  |         |       |       |     |       |
| Sirt1    |       |       |       |       |       |       |          |      |       |       |        |       |       |       |       |       |         |       |       |     |       |
| Sirt3    | -0.28 | -0.64 | -0.60 | 0.11  | 0.02  | 0.53  | 0.73     |      | 0.22  |       | 0.05   |       | -0.35 | 0.31  | -0.60 | -0.85 | -0.61   |       |       |     |       |
| Fas      | 0.40  | 0.79  | 0.69  | -0.15 | 0.00  | -0.59 | -0.85    |      | -0.18 |       | 0.09   |       | 0.54  | -0.30 | 0.67  | 0.93  | 0.72    |       | -0.98 |     |       |
| Fgf21    |       |       |       |       |       |       |          |      |       |       |        |       |       |       |       |       |         |       |       |     |       |

| 6M       | Bmal1 | Cry1  | Cry 2 | Per1  | Per2  | Dbp   | Rev-erba | Ucp1 | Ucp3  | Ppara | Pgc-1α | Glut2 | Glut4 | Pdk4  | Hsl   | Lpl   | Srebp1c | Sirt1 | Sirt3 | Fas | Fgf21 |
|----------|-------|-------|-------|-------|-------|-------|----------|------|-------|-------|--------|-------|-------|-------|-------|-------|---------|-------|-------|-----|-------|
| Bmal1    |       |       |       |       |       |       |          |      |       |       |        |       |       |       |       |       |         |       |       |     |       |
| Cry1     | 0.66  |       |       |       |       |       |          |      |       |       |        |       |       |       |       |       |         |       |       |     |       |
| Cry 2    | 0.65  | 0.90  |       |       |       |       |          |      |       |       |        |       |       |       |       |       |         |       |       |     |       |
| Per1     | -0.88 | -0.24 | -0.32 |       |       |       |          |      |       |       |        |       |       |       |       |       |         |       |       |     |       |
| Per2     | -0.98 | -0.56 | -0.49 | 0.91  |       |       |          |      |       |       |        |       |       |       |       |       |         |       |       |     |       |
| Dbp      | -0.88 | -0.93 | -0.82 | 0.55  | 0.82  |       |          |      |       |       |        |       |       |       |       |       |         |       |       |     |       |
| Rev-erba | -0.28 | -0.85 | -0.59 | -0.20 | 0.22  | 0.69  |          |      |       |       |        |       |       |       |       |       |         |       |       |     |       |
| Ucp1     |       |       |       |       |       |       |          |      |       |       |        |       |       |       |       |       |         |       |       |     |       |
| Ucp3     | 0.98  | 0.77  | 0.79  | -0.80 | -0.92 | -0.92 | -0.37    |      |       |       |        |       |       |       |       |       |         |       |       |     |       |
| Ppara    |       |       |       |       |       |       |          |      |       |       |        |       |       |       |       |       |         |       |       |     |       |
| Pgc-1α   | -0.47 | 0.33  | 0.15  | 0.83  | 0.53  | -0.01 | -0.71    |      | -0.34 |       |        |       |       |       |       |       |         |       |       |     |       |
| Glut2    |       |       |       |       |       |       |          |      |       |       |        |       |       |       |       |       |         |       |       |     |       |
| Glut4    | 0.38  | 0.04  | -0.31 | -0.37 | -0.53 | -0.28 | -0.18    |      | 0.20  |       | -0.22  |       |       |       |       |       |         |       |       |     |       |
| Pdk4     | 0.96  | 0.82  | 0.84  | -0.74 | -0.88 | -0.94 | -0.43    |      | 1.00  |       | -0.27  |       | 0.15  |       |       |       |         |       |       |     |       |
| Hsl      | 0.37  | 0.88  | 0.94  | 0.03  | -0.20 | -0.68 | -0.71    |      | 0.55  |       | 0.47   |       | -0.43 | 0.62  |       |       |         |       |       |     |       |
| Lpl      | 0.60  | 0.99  | 0.93  | -0.17 | -0.48 | -0.89 | -0.84    |      | 0.73  |       | 0.38   |       | -0.07 | 0.79  | 0.93  |       |         |       |       |     |       |
| Srebp1c  | 0.93  | 0.88  | 0.86  | -0.67 | -0.86 | -0.98 | -0.54    |      | 0.98  |       | -0.15  |       | 0.18  | 0.99  | 0.67  | 0.85  |         |       |       |     |       |
| Sirt1    |       |       |       |       |       |       |          |      |       |       |        |       |       |       |       |       |         |       |       |     |       |
| Sirt3    | 0.22  | -0.58 | -0.46 | -0.65 | -0.34 | 0.26  | 0.81     |      | 0.06  |       | -0.94  |       | 0.34  | -0.03 | -0.74 | -0.64 | -0.13   |       |       |     |       |
| Fas      | -0.21 | 0.57  | 0.56  | 0.60  | 0.36  | -0.24 | -0.70    |      | -0.02 |       | 0.86   |       | -0.55 | 0.07  | 0.82  | 0.64  | 0.15    |       | -0.97 |     |       |
| Fgf21    |       |       |       |       |       |       |          |      |       |       |        |       |       |       |       |       |         |       |       |     |       |

- significant correlation
- significant correlation lost for 6M feeding
- significant correlation for 6M & ad lib in SAME direction
- significant correlation for 6M & ad lib in OPPOSITE direction
